# Supplementary material for: Rational design of a new cytarabine-based prodrug for highly efficient oral delivery of cytarabine
Source: Royal Society of Chemistry journal article supplement (doi:10.1039/c8ra01225c), 2018-01-01
Supplement: c8ra01225c1.pdf [file c8ra01225c1.pdf]

1

## Supplementary information

2

### 3 **Rational design of a new cytarabine-based prodrug for** 4 **highly efficient oral delivery of cytarabine**

5 Jing Zhang,<sup>a</sup> Di Zhang,<sup>a</sup> Xu Hu,<sup>a</sup> Ruiling Liu,<sup>a</sup> Zhonghao Li,<sup>b</sup> Yuxia Luan<sup>a\*</sup>

6 <sup>a</sup> School of Pharmaceutical Science, Shandong University, 44 West Wenhua Road,  
7 Jinan, Shandong Province 250012, China, E-mail: yuxialuan@sdu.edu.cn.

8 <sup>b</sup> Key Laboratory of Colloid & Interface Chemistry, Shandong University, Ministry of  
9 Education, 250100, China.

10

11

12

13

14

15 **Conditions for HPLC-MS**

16 **1. HPLC**

17 A C18 column (150 mm × 4.6 mm i.d. 5 mm, Thermo) coupled with a Phenomenex  
18 C18 guard column (4 mm × 3.0 mm i.d. 5 mm) conducted the quantitative analysis.  
19 Column temperature: 25 °C. The The gradient elution conditions for HPLC-  
20 MSmeasurements was shown in Table S1. The flow rate was 0.6 mL min<sup>-1</sup>.

21 **2. MS**

22 A triple quadrupole mass spectrometer (Agilent 1260)was equipped with an ESI  
23 (electrospray ionization)source. IS was 5500 V, TEM was 650 °C, and the scanning  
24 mode was used to monitor the positive ion scanning mode. GAS1 and GAS2 were  
25 both 60 psi, CAD was 6 psi and CUR was 15 psi.

26

27

28 **Table S1.** The gradient elution conditions for HPLC-MS/MS measurements.

| Time (min)   | 0-2 | 2-4   | 4-12  | 12-16.5 |
|--------------|-----|-------|-------|---------|
| methanol (%) | 20  | 20→90 | 90→95 | 95      |

29

30

31

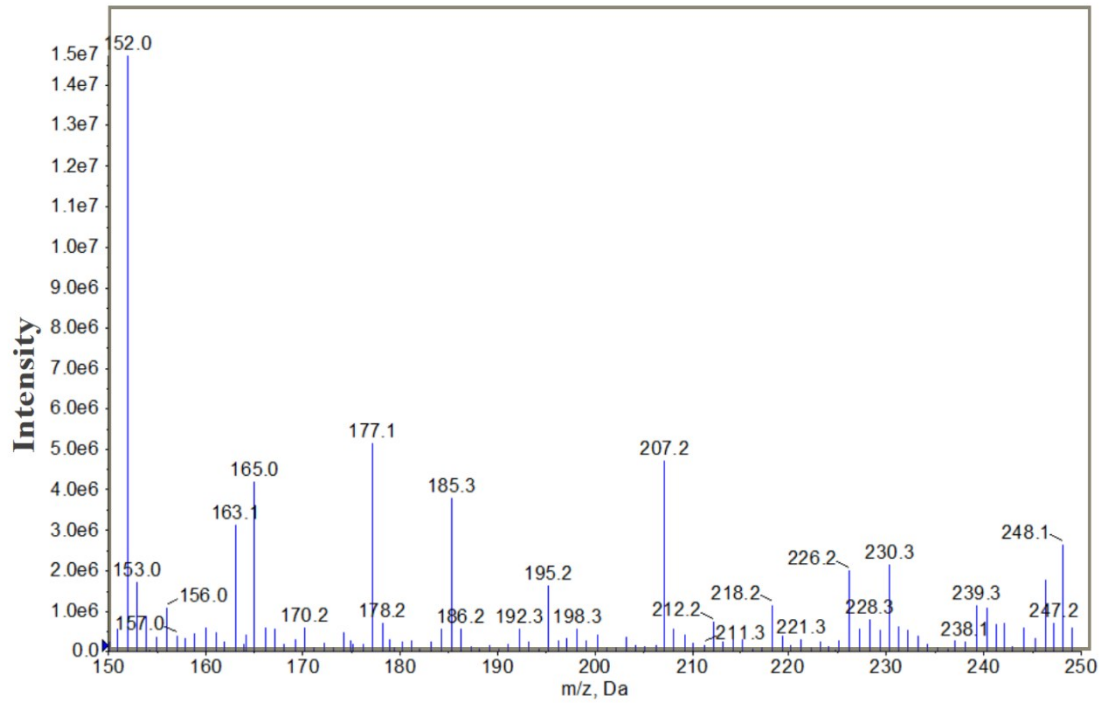

32

33 **Fig. S1.** The first-order mass spectra of acyclovir.

34

35

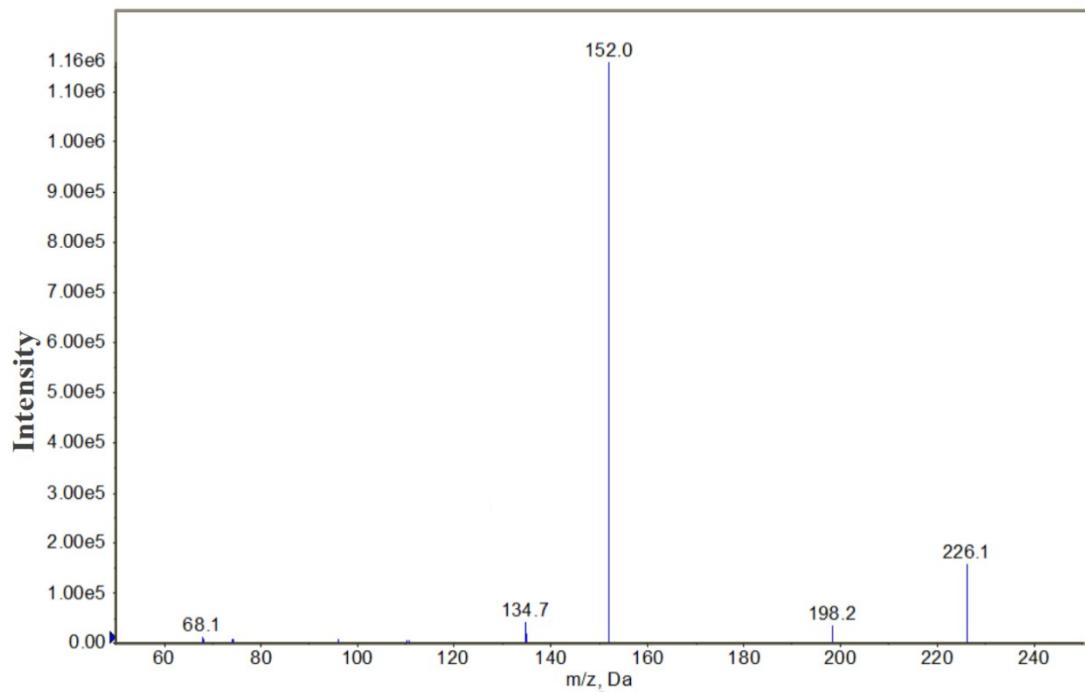

36

37 **Fig. S2.** The second-order mass spectra of acyclovir.

38

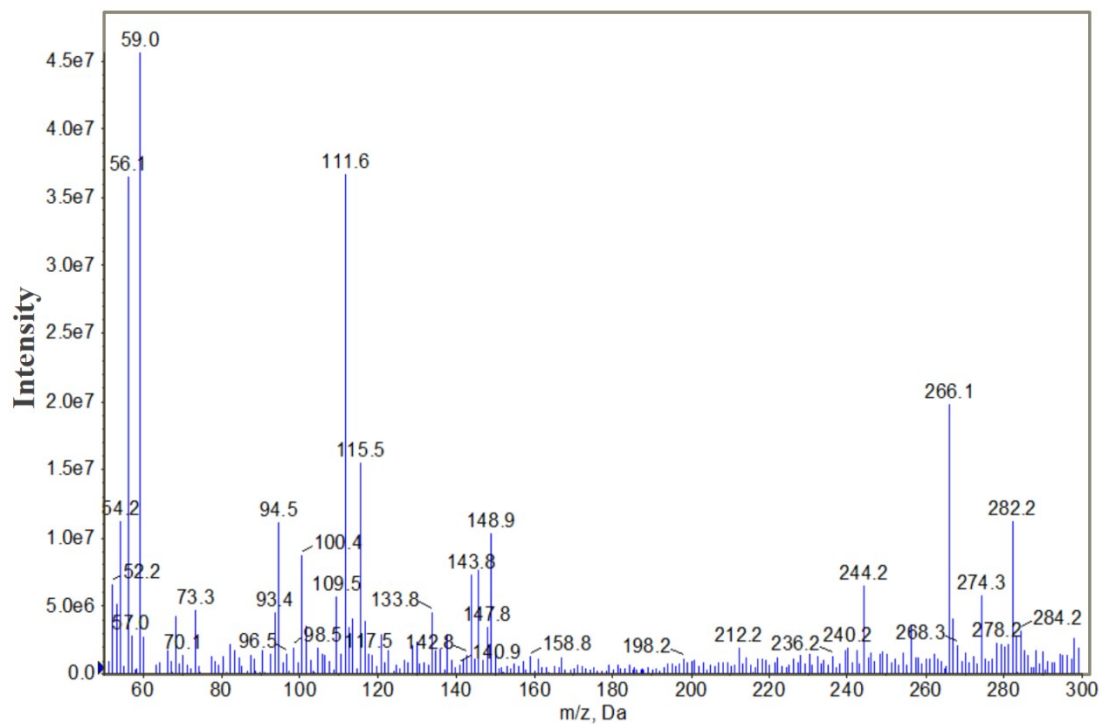

39

40 **Fig. S3.** The first-order mass spectra of Ara-C.

41

42

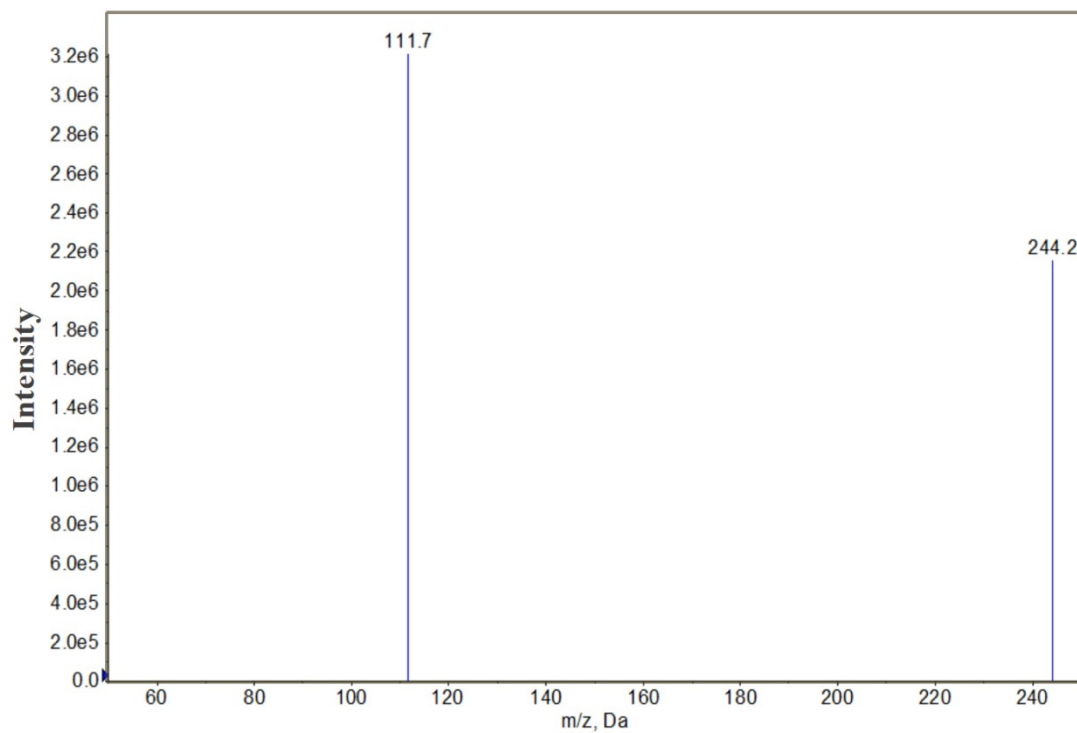

43

44 **Fig. S4.** The second-order mass spectra of Ara-C.

45

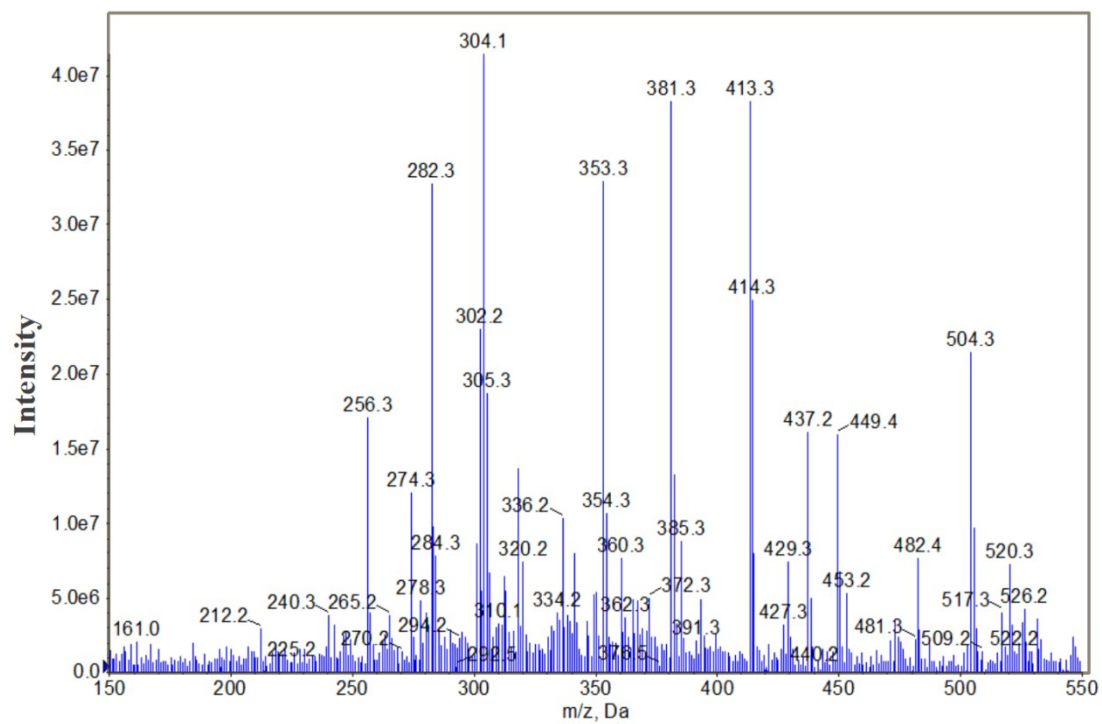

46

47 Fig. S5. The first-order mass spectra of PA-Ara.

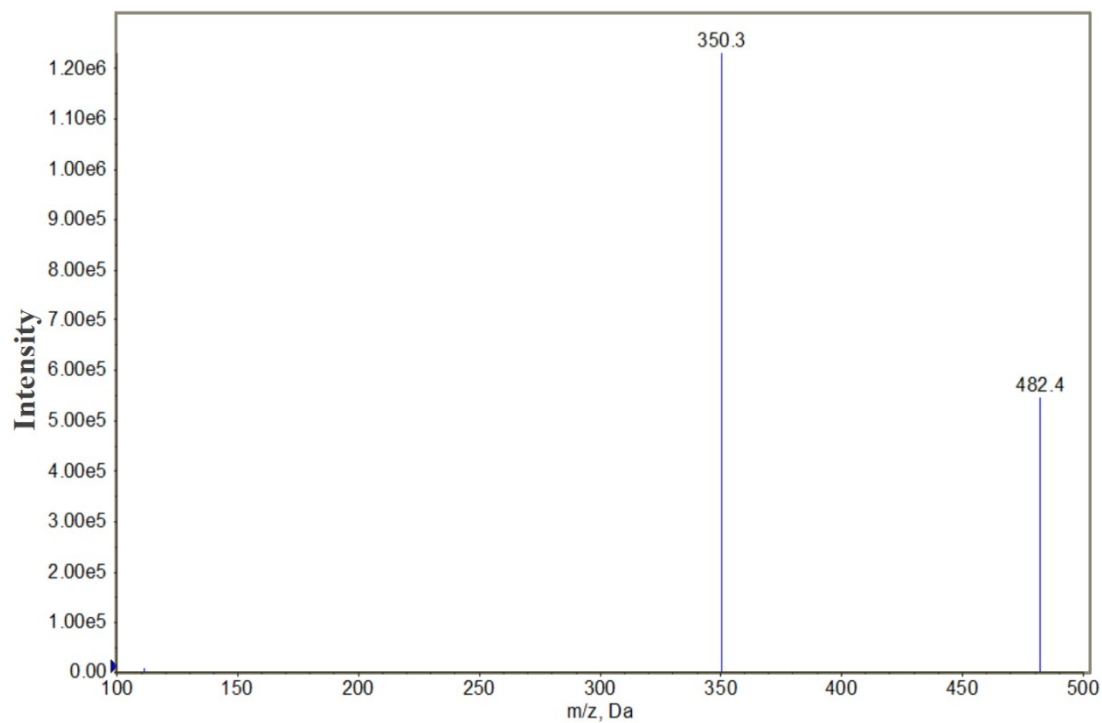

48

49 Fig. S6. The second-order mass spectra of PA-Ara.

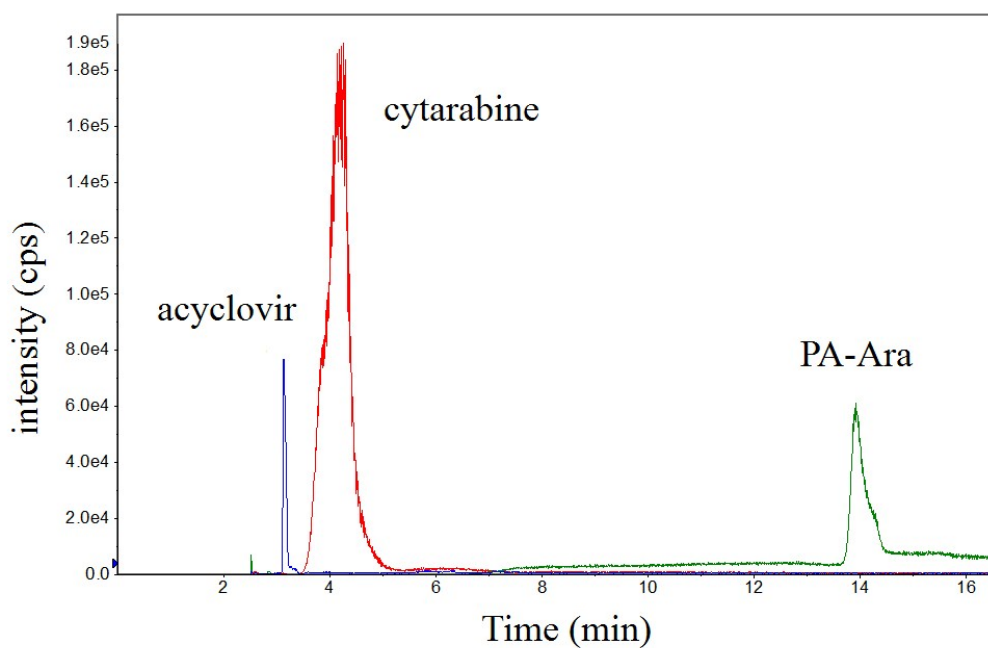

50

51 **Fig. S7.** The chromatograms of acyclovir ( $m/z$  226 $\rightarrow$ 152), cytarabine ( $m/z$  244 $\rightarrow$ 112)

52 and PA-Ara ( $m/z$  482 $\rightarrow$ 350) in rat plasma samples.

53

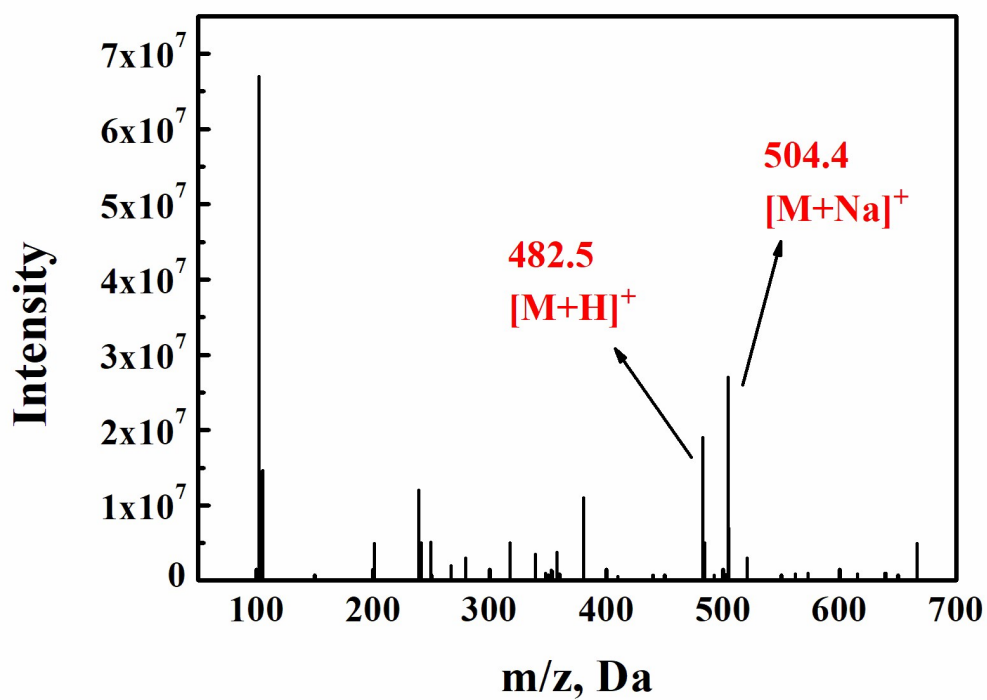

54

55 **Fig. S8.** Mass spectra of prodrug PA-Ara.
